# Supplementary figures and images for: Expression of Dopamine-Related Genes in Four Human Brain Regions
Source: MDPI journal article supplement (doi:10.3390/brainsci10080567), 2020-08-18

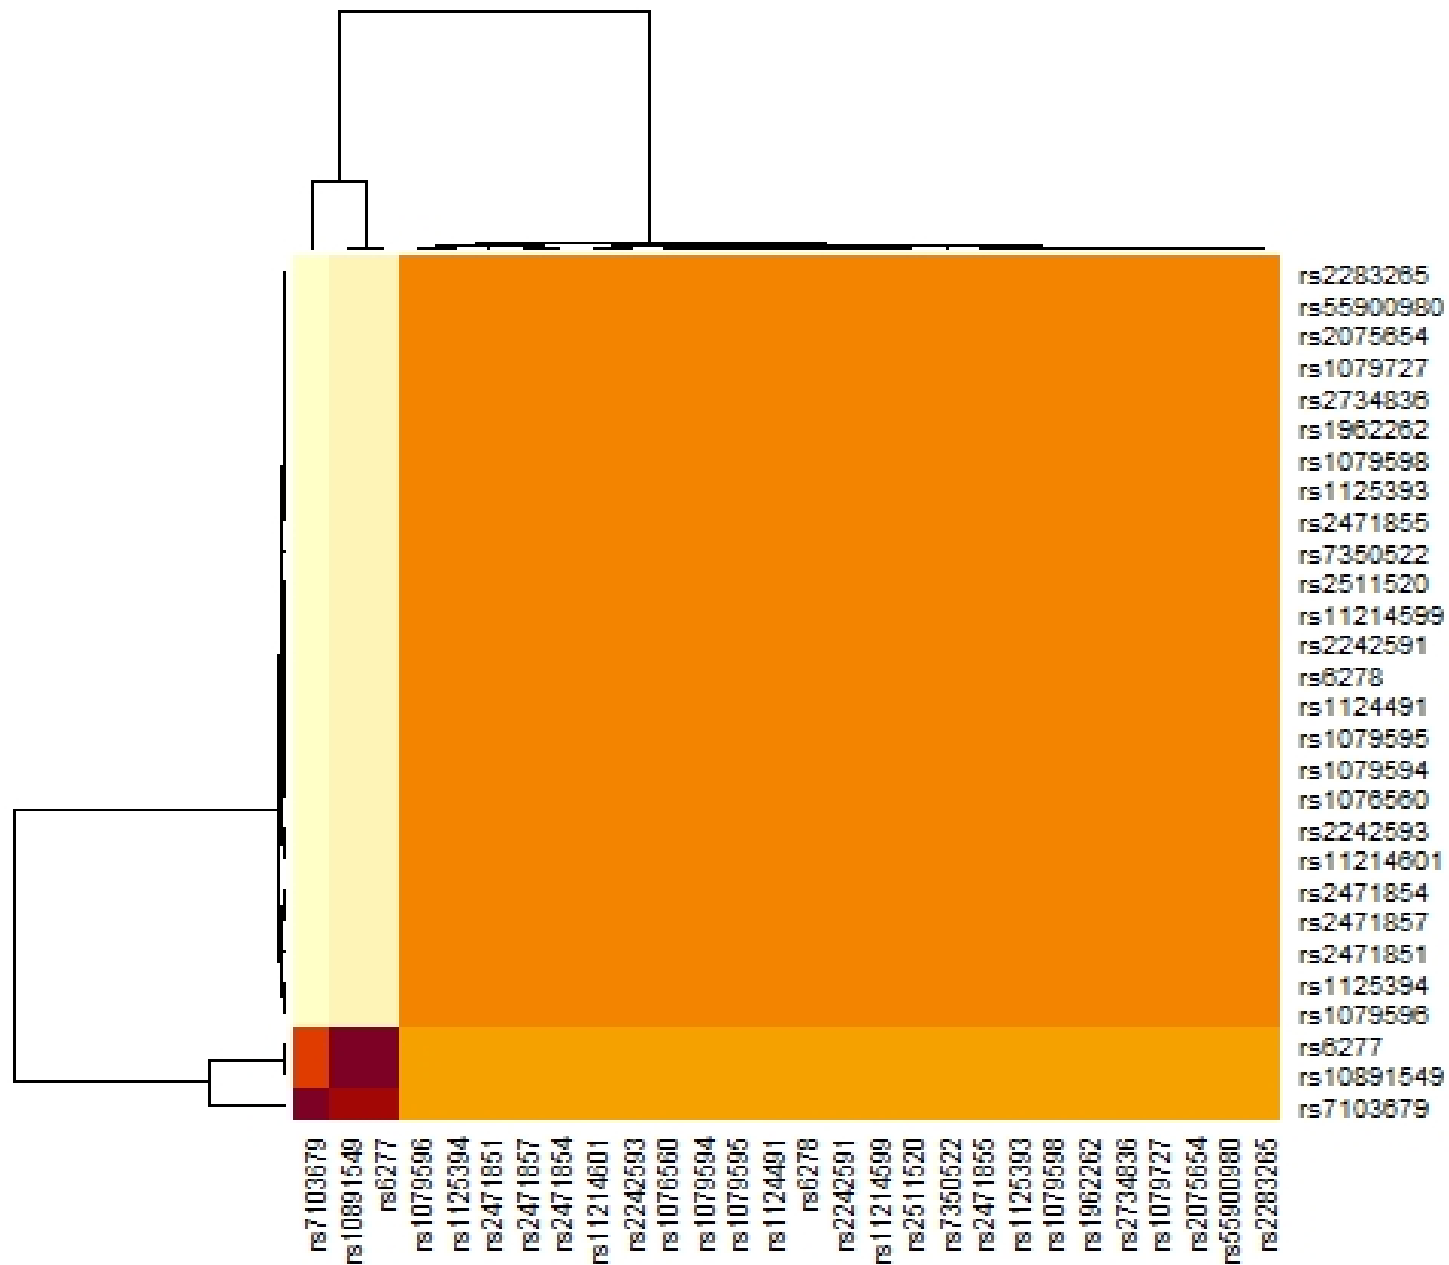

**Supplementary Figure 1.** Linkage disequilibrium structure for 3 haplotype blocks of *DRD2*.

Supplement: s1 [file s1]
